# Supplementary material for: Microbiological Etiology in Patients with IE Undergoing Surgery and for Patients with Medical Treatment Only: A Nationwide Study from 2010 to 2020
Source: MDPI journal article supplement (doi:10.3390/microorganisms11102403), 2023-09-26

# Supplemental Material

## Table of content

|                                                                                                                                                                                       |    |
|---------------------------------------------------------------------------------------------------------------------------------------------------------------------------------------|----|
| <b>Table S1:</b> Overview of codes used to define study population, co-medication, and comorbidity.....                                                                               | 3  |
| <b>Table S2a:</b> <i>Streptococcus</i> species - distribution on species level.....                                                                                                   | 5  |
| <b>Table S2b:</b> Coagulase-negative Staphylococci - distribution on species level.....                                                                                               | 6  |
| <b>Table S2c:</b> Other microbiological causes - distribution on species level .....                                                                                                  | 7  |
| <b>Table S3:</b> Frequencies and proportions of the heart valves replaced in the surgical treated patients.....                                                                       | 8  |
| <b>Table S4:</b> Baseline characteristics in the age -and sex-matched cohort stratified by treatment choice.....                                                                      | 9  |
| <b>Table S5:</b> Baseline characteristics stratified by microbiological etiology in patients who underwent surgery.<br>.....                                                          | 11 |
| <b>Table S6:</b> Overview of status at discharge (alive or dead) in numbers and percentages according to<br>microbiological etiology and treatment choice .....                       | 13 |
| <b>Figure S1:</b> Proportion of treatment choice stratified by microbiological etiologies after exclusion of CIED at<br>baseline.....                                                 | 14 |
| <b>Figure S2:</b> Proportion of microbiological etiologies stratified by treatment choice (surgery during admission<br>vs. medical therapy) after exclusion of CIED at baseline ..... | 15 |
| <b>Figure S3:</b> Proportion of microbiological etiologies stratified by treatment choice (surgery during admission<br>vs. medical therapy) in an age – and sex-matched cohort .....  | 16 |
| <b>Figure S4:</b> Cumulative incidence of surgery during admission stratified by microbiological etiology .....                                                                       | 17 |
| <b>Figure S5A+B:</b> Mortality rates by microbiological etiology and treatment choice (surgery during admission<br>vs. medical therapy) in an age -and sex-matched cohort.....        | 18 |

**Table S1:** Overview of codes used to define study population, co-medication, and comorbidity

| Category                                                       | Codes                                                                                                                                                                                                                                                         |
|----------------------------------------------------------------|---------------------------------------------------------------------------------------------------------------------------------------------------------------------------------------------------------------------------------------------------------------|
| <u>Study population</u>                                        |                                                                                                                                                                                                                                                               |
| Infective endocarditis (first-time event)                      | ICD-10: DI33, DI38, DI398; ICD8: 421                                                                                                                                                                                                                          |
| Surgery during admission                                       | <u>NOMESCO</u>                                                                                                                                                                                                                                                |
| <i>Aortic valve</i>                                            | Bioprostheses: KFMD10, KFCA70<br>Mechanical prostheses: KFMD00, KFCA60<br>Other valve prostheses: KFMD20, KFMD30, KFMD33, KFMD96                                                                                                                              |
| <i>Mitral valve</i>                                            | KFK                                                                                                                                                                                                                                                           |
| <i>Pulmonic valve</i>                                          | KFJB, KFJC, KFJE, KFJF, KFJW                                                                                                                                                                                                                                  |
| <i>Tricuspid valve</i>                                         | KFG                                                                                                                                                                                                                                                           |
| <u>Comorbidity/previous intervention (prior to index date)</u> |                                                                                                                                                                                                                                                               |
| Aortic valve disease                                           | ICD-10: I35s<br>ICD-8: 395, 396                                                                                                                                                                                                                               |
| Atrial flutter/fibrillation                                    | ICD-10: DI48,<br>ICD-8:42793, 42794                                                                                                                                                                                                                           |
| Chronic obstructive lung disease (COPD)                        | ICD-10: DJ42-44<br>ICD-8: 490-492                                                                                                                                                                                                                             |
| Chronic kidney disease (CKD)                                   | ICD-10: DN02-08, DN11-12, DN14, DN18-19, DN26, DN158-160, DN162-164, DN168, DQ612-613, DQ615, DQ619, DE102, DE112, DE132, DE142, DI120, DI131, DM300, DM313, DM319, DM321, DZ992<br>ICD-8: 403-404, 581-584, 25002, 40039, 59009, 59320, 75310, 754311, 75319 |
| CIED                                                           | NOMESCO: BFCA0, BFCB0                                                                                                                                                                                                                                         |
| Diabetes mellitus                                              | ICD-10: DE10-14<br>ICD-8: 250<br>ATC code: A10                                                                                                                                                                                                                |
| Heart failure                                                  | ICD10: DI42, DI50, DI099, DI110, DI130, DI132, DJ819<br>ICD-8: 425, 428, 4270, 4271, 78249                                                                                                                                                                    |
| Ischemic heart disease (IHD)                                   | ICD-10: DI20-25<br>ICD-8: 410-414                                                                                                                                                                                                                             |
| <i>PCI</i>                                                     | NOMESCO: KFNG0, KFNG10, KFNG12, KFNG96                                                                                                                                                                                                                        |
| <i>CABG</i>                                                    | NOMESCO: KFNA, KFNB, KFNC, KFNC, KFNE                                                                                                                                                                                                                         |
| Liver disease                                                  | ICD-10: DB15-19, DK70-77, DC22, DI982, DZ944, DD684C, DQ618A,<br>ICD-8: 571-573, 155, 070                                                                                                                                                                     |
| Malignancy                                                     | ICD-10: DC00-97, not including C44 (skin cancer)<br>ICD-8: 140-209, not including 173 (skin cancer)                                                                                                                                                           |
| Mitral valve disease                                           | ICD-10: I34                                                                                                                                                                                                                                                   |

|                                                              |                                                                                                                   |
|--------------------------------------------------------------|-------------------------------------------------------------------------------------------------------------------|
| Prosthetic heart valve                                       | ICD-8: 394, 396                                                                                                   |
| Renal dialysis                                               | KFKD, KFMD, KFGE, KFJF, KFCA60, KFCA70                                                                            |
|                                                              | ICD-10: DZ992                                                                                                     |
|                                                              | NOMESCO: BFJD2                                                                                                    |
| <u>Pharmacotherapy (within 6 months prior to index date)</u> |                                                                                                                   |
| Anticoagulants (DOAC and VKA)                                | ATC code: B01AA, B01AE, B01AF                                                                                     |
| Beta blockers                                                | ATC code: C07, C09BX                                                                                              |
| Lipid-lowering medication                                    | ATC code: C10                                                                                                     |
| RAS-inhibitors                                               | ATC code: C09                                                                                                     |
| <u>Hypertension</u>                                          | <i>Defined as two or more antihypertensive drugs within 6 months prior to index data including the following:</i> |
| <i>Adrenergic antagonists</i>                                | ATC code: C02A, C02B, C02C                                                                                        |
| <i>Beta blockers</i>                                         | ATC code: C07, C09BX                                                                                              |
| <i>Calcium channel blockers</i>                              | ATC code: C08, C07F, C09BB, C09DB                                                                                 |
| <i>Combined diuretics</i>                                    | ATC code: C07C, C08G, C03B, C09BA, C09DA                                                                          |
| <i>Loop-diuretics</i>                                        | ATC code: C03C, C03EB01, C03EB02                                                                                  |
| <i>MRA</i>                                                   | ATC code: C03DA01-C03DA04                                                                                         |
| <i>RAS-inhibitors</i>                                        | ATC code: C09                                                                                                     |
| <i>Thiazide diuretics</i>                                    | ATC code: C03A, C07B, C07D, C09XA52, C03EA01                                                                      |
| <i>Vasodilating drugs</i>                                    | ATC code: C02DB, C02DD, C02DG                                                                                     |

---

ICD: international classification of diseases, ATC: Anatomical Therapeutical Classification System, AMI: acute myocardial infarction, PCI: percutaneous coronary intervention, CABG: coronary artery bypass grafting, CIED: cardiac implantable electronic device, DOAC: direct oral anticoagulant therapy, MRA: aldosterone receptor antagonists, RAS: renin angiotensin system, VKA: vitamin K antagonists

**Table S2a:** *Streptococcus* species - distribution on species level

| Microorganism                                        | Counts | Percent |
|------------------------------------------------------|--------|---------|
| <b>Non-hemolytic streptococci</b>                    |        |         |
| <b><i>S. anginosus</i> / <i>S. milleri</i> group</b> |        |         |
| <i>S. anginosus</i>                                  | 67     | 2.82    |
| <i>S. milleri</i>                                    | 13     | 0.74    |
| <i>S. constellatus</i>                               | 4      | 0.23    |
| <i>S. intermedius</i>                                | 6      | 0.34    |
| <b><i>S. bovis</i> / <i>equinus</i> group</b>        |        |         |
| <i>S. bovis</i>                                      | 163    | 9.30    |
| <i>S. gallolyticus</i>                               | 39     | 2.23    |
| <i>S. infantarius</i>                                | 7      | 0.40    |
| <b><i>S. mitis</i> group</b>                         |        |         |
| <i>S. mitis</i>                                      | 385    | 21.97   |
| <i>S. gordonii</i>                                   | 36     | 2.05    |
| <i>S. oralis</i>                                     | 33     | 1.88    |
| <i>S. parasanguinis</i>                              | 10     | 0.57    |
| <i>S. sanguinis</i>                                  | 108    | 6.16    |
| <i>S. pneumoniae</i>                                 | 77     | 4.39    |
| <i>S. salivarius</i>                                 | 55     | 3.14    |
| <i>S. mutans</i>                                     | 98     | 5.59    |
| <b>Non-hemolytic streptococci unspecified</b>        | 116    | 6.62    |
| <b>Hemolytic streptococci</b>                        |        |         |
| Hemolytic streptococci unspecified                   | 43     | 2.45    |
| <i>Hemolytic streptococci group A</i>                | 32     | 1.83    |
| <i>Hemolytic streptococci group B</i>                | 149    | 8.50    |
| <i>Hemolytic streptococci group C</i>                | 60     | 3.42    |
| <i>Hemolytic streptococci group G</i>                | 133    | 7.59    |
| <i>Streptococcus dysgalactiae</i>                    | 33     | 1.88    |
| <b>Other</b>                                         |        |         |
| <i>Abiotrophia defectiva</i>                         | 23     | 1.31    |
| <i>Gemella haemolysans</i>                           | 5      | 0.29    |
| <i>Granulicatella adiacens</i>                       | 17     | 0.97    |
| <i>Granulicatella elegans</i>                        | 4      | 0.23    |
| Streptococcus species unspecified                    | 36     | 2.05    |

**Table S2b:** Coagulase-negative Staphylococci - distribution on species level

| <b>Microorganism</b>                      | <b>Counts</b> | <b>Percent</b> |
|-------------------------------------------|---------------|----------------|
| Bacteria anonymized due to count below 3  | 4             | 0.97           |
| <i>Staphylococcus capitis</i>             | 28            | 6.76           |
| <i>Staphylococcus epidermidis</i>         | 243           | 58.70          |
| <i>Staphylococcus haemolyticus</i>        | 12            | 2.90           |
| <i>Staphylococcus hominis</i>             | 25            | 6.04           |
| <i>Staphylococcus lugdunensis</i>         | 43            | 10.39          |
| <i>Staphylococcus species unspecified</i> | 55            | 13.29          |
| <i>Staphylococcus warneri</i>             | 4             | 0.97           |

**Table S2c:** Other microbiological causes - distribution on species level

| <b>Microorganism</b>                            | <b>Count</b> | <b>Percent</b> |
|-------------------------------------------------|--------------|----------------|
| <b>HACAK</b>                                    |              |                |
| <i>Haemophilus parainfluenzae</i>               | 13           | 3.98           |
| <i>Aggregatibacter aphrophilus</i>              | 8            | 2.45           |
| <i>Aggregatibacter actinomycetemcomitans</i>    | 17           | 5.2            |
| <i>Cardiobacterium hominis</i>                  | 13           | 3.98           |
| <i>Cardiobacterium species</i>                  | 3            | 0.92           |
| <i>Kingella kingae</i>                          | 5            | 1.53           |
| <b>Gram-positive bacteria</b>                   |              |                |
| <i>Aerococcus species</i>                       | 4            | 1.22           |
| <i>Aerococcus urinae</i>                        | 29           | 8.87           |
| <i>Corynebacterium striatum</i>                 | 4            | 1.22           |
| <i>Lactocaseibacillus rhamnosus</i>             | 3            | 0.92           |
| <i>Lactocaseibacillus species</i>               | 3            | 0.92           |
| <i>Listeria monocytogenes</i>                   | 6            | 1.83           |
| <i>Micrococcus species</i>                      | 3            | 0.92           |
| <i>Rothia dentocariosa</i>                      | 3            | 0.92           |
| <b>Gram-negative bacteria</b>                   |              |                |
| <i>Enterobacter cloacae</i>                     | 8            | 2.45           |
| <i>Escherichia coli</i>                         | 40           | 12.23          |
| <i>Haemophilus influenzae</i>                   | 5            | 1.53           |
| <i>Klebsiella oxytoca</i>                       | 9            | 2.75           |
| <i>Klebsiella pneumoniae</i>                    | 15           | 4.59           |
| <i>Pseudomonas aeruginosa</i>                   | 12           | 3.67           |
| <i>Serratia marcescens</i>                      | 8            | 2.45           |
| <b>Anaerobic</b>                                |              |                |
| <i>Bacteroides fragilis</i>                     | 3            | 0.92           |
| <i>Cutibacterium acnes</i>                      | 21           | 6.42           |
| <b>Fungus</b>                                   |              |                |
| <i>Candida albicans</i>                         | 8            | 2.45           |
| <i>Candida glabrata</i>                         | 5            | 1.53           |
| <b>Unspecified</b>                              | 13           | 3.98           |
| <b>Bacteria anonymized due to count below 3</b> | 66           | 20.18          |

**Table S3:** Frequencies and proportions of the heart valves replaced in the surgical treated patients

| <b>Surgical valve replacements</b>                                | <b>Numbers</b> | <b>Proportion (%)</b> |
|-------------------------------------------------------------------|----------------|-----------------------|
| <b>Left-sided valves</b>                                          | <b>1184</b>    | <b>92.79</b>          |
| Isolated aortic valve <sup>a</sup>                                | 632            | 53.38                 |
| Isolated mitral valve <sup>a</sup>                                | 343            | 28.97                 |
| Combined (aortic and mitral valves) <sup>a</sup>                  | 209            | 17.65                 |
| <b>Right-sided valves</b>                                         | <b>31</b>      | <b>2.43</b>           |
| <b>Combined left -and right-sided valves</b>                      | <b>61</b>      | <b>4.78</b>           |
| Aortic valve and right-sided valves <sup>b</sup>                  | 28             | 45.90                 |
| Mitral valve and right-sided valves <sup>b</sup>                  | 13             | 21.31                 |
| Both aortic and mitral valves and right-sided valves <sup>b</sup> | 20             | 32.79                 |

<sup>a</sup>Frequencies and proportions of left-sided valve replacements. The percentages add up to 100% of all 1184 solely left-sided valve replacements.

<sup>b</sup>Frequencies and proportions of combined left -and right-sided valve replacements. The percentages add up to 100% of all 66 combined left -and right-sided valve replacements.



**Table S4:** Baseline characteristics in the age -and sex-matched cohort stratified by treatment choice

| Variable                                                         | Medical therapy only, N = 1270 <sup>a</sup> | Surgery during admission, N = 1270 <sup>a</sup> |
|------------------------------------------------------------------|---------------------------------------------|-------------------------------------------------|
| Males                                                            | 973 (76.6)                                  | 973 (76.6)                                      |
| Age                                                              | 65 [54-72]                                  | 65 [54-72]                                      |
| Length of hospital stay (days)                                   | 36 [26-48]                                  | 46 [35-58]                                      |
| Length of hospital stay among patients alive at discharge (days) | 41 [30-49]                                  | 46 [39-59]                                      |
| Microbiological etiology                                         |                                             |                                                 |
| <i>Staphylococcus aureus</i>                                     | 478 (37.6)                                  | 262 (20.6)                                      |
| <i>Streptococcus</i>                                             | 310 (24.4)                                  | 444 (35.0)                                      |
| <i>Enterococcus</i>                                              | 153 (12.0)                                  | 183 (14.4)                                      |
| CoNS                                                             | 93 (7.3)                                    | 91 (7.2)                                        |
| Other                                                            | 60 (4.7)                                    | 77 (6.1)                                        |
| Negative                                                         | 176 (13.9)                                  | 213 (16.8)                                      |
| Prosthetic heart valve                                           | 210 (16.5)                                  | 246 (19.4)                                      |
| Cardiac implantable electrical devices (CIED)                    | 235 (18.5)                                  | 70 (5.5)                                        |
| Aortic valve disease                                             | 253 (19.9)                                  | 362 (28.5)                                      |
| Mitral valve disease                                             | 82 (6.5)                                    | 124 (9.8)                                       |
| Atrial fibrillation (AF)                                         | 253 (19.9)                                  | 189 (14.9)                                      |
| Heart failure (HF)                                               | 231 (18.2)                                  | 155 (12.2)                                      |
| Ischemic heart disease (IHD)                                     | 334 (26.3)                                  | 226 (18.8)                                      |
| Cerebrovascular disease (CVD)                                    | 176 (13.9)                                  | 149 (11.7)                                      |
| Dementia                                                         | 14 (1.1)                                    | ≤3                                              |
| Hypertension                                                     | 622 (49.0)                                  | 512 (40.3)                                      |
| Chronic kidney disease (CKD)                                     | 137 (10.8)                                  | 78 (6.1)                                        |
| Dialysis                                                         | 91 (7.2%)                                   | 53 (4.2)                                        |
| Diabetes                                                         | 309 (24.3)                                  | 202 (15.9)                                      |
| Liver disease                                                    | 114 (9.0)                                   | 35 (2.8)                                        |
| Chronic obstructive pulmonary disease (COPD)                     | 128 (10.1)                                  | 76 (6.0)                                        |
| Charlson comorbidity index                                       |                                             |                                                 |

**Table S4:** Baseline characteristics in the age -and sex-matched cohort stratified by treatment choice

| Variable                  | Medical therapy only, N = 1270 <sup>a</sup> | Surgery during admission, N = 1270 <sup>a</sup> |
|---------------------------|---------------------------------------------|-------------------------------------------------|
| 0                         | 454 (35.7)                                  | 704 (55.4)                                      |
| 1-2                       | 432 (34.0)                                  | 412 (32.4)                                      |
| >2                        | 384 (30.2)                                  | 154 (12.1)                                      |
| Anticoagulants            | 322 (25.4)                                  | 260 (20.5)                                      |
| Beta blockers             | 481 (37.9)                                  | 336 (26.5)                                      |
| Lipid-lowering medication | 462 (36.4)                                  | 409 (32.2)                                      |
| RAS inhibitors            | 498 (39.2)                                  | 464 (36.5)                                      |

<sup>a</sup>Median [25th.75th percentile] or Frequency (%)

**Table S5:** Baseline characteristics stratified by microbiological etiology in patients who underwent surgery.

| Variable                                         | <i>S. aureus</i> ,<br>N = 262 <sup>a</sup> | <i>Streptococcus</i><br>spp.,<br>N = 447 <sup>a</sup> | <i>Enterococcus</i><br>spp.,<br>N = 183 <sup>a</sup> | CoNS,<br>N = 92 <sup>a</sup> | Other,<br>N = 77 <sup>a</sup> | Negative,<br>N = 215 <sup>a</sup> |
|--------------------------------------------------|--------------------------------------------|-------------------------------------------------------|------------------------------------------------------|------------------------------|-------------------------------|-----------------------------------|
| Males                                            | 180 (68.7%)                                | 349 (78.1%)                                           | 153 (83.6%)                                          | 67 (72.8%)                   | 65 (84.4%)                    | 159 (74.0%)                       |
| Age                                              | 61.0 [49.0-<br>70.0]                       | 64.0 [55.0-<br>71.5]                                  | 71.0 [64.0-<br>76.0]                                 | 65.5 [57.0-<br>73.0]         | 64.0 [53.0-<br>71.0]          | 62.0 [51.0-<br>71.5]              |
| Length of hospital stay (days)                   | 51.0 [43.0-<br>67.0]                       | 43.0 [32.0-<br>51.0]                                  | 50.0 [44.0-<br>65.0]                                 | 46.0 [42.0-<br>58.2]         | 47.0 [34.0-<br>60.0]          | 45.0 [31.5-<br>54.0]              |
| Prior valve prosthesis                           | 46 (17.6%)                                 | 67 (15.0%)                                            | 39 (21.3%)                                           | 33 (35.9%)                   | 13 (16.9%)                    | 50 (23.3%)                        |
| Cardiac implantable electrical<br>devices (CIED) | 15 (5.7%)                                  | 5 (1.1%)                                              | 23 (12.6%)                                           | 7 (7.6%)                     | 7 (9.1%)                      | 13 (6.0%)                         |
| Aortic valve disease                             | 52 (19.8%)                                 | 99 (22.1%)                                            | 70 (38.3%)                                           | 37 (40.2%)                   | 26 (33.8%)                    | 78 (36.3%)                        |
| Mitral valve disease                             | 16 (6.1%)                                  | 35 (7.8%)                                             | 14 (7.7%)                                            | 20 (21.7%)                   | 6 (7.8%)                      | 33 (15.3%)                        |
| Atrial fibrillation (AF)                         | 35 (13.4%)                                 | 56 (12.5%)                                            | 31 (16.9%)                                           | 26 (28.3%)                   | 12 (15.6%)                    | 29 (13.5%)                        |
| Heart failure (HF)                               | 25 (9.5%)                                  | 33 (7.4%)                                             | 33 (18.0%)                                           | 24 (26.1%)                   | 8 (10.4%)                     | 33 (15.3%)                        |
| Ischemic heart disease (IHD)                     | 38 (14.5%)                                 | 62 (13.9%)                                            | 50 (27.3%)                                           | 19 (20.7%)                   | 15 (19.5%)                    | 42 (19.5%)                        |
| Hypertension                                     | 109 (41.6%)                                | 142 (31.8%)                                           | 96 (52.5%)                                           | 41 (44.6%)                   | 27 (35.1%)                    | 97 (45.1%)                        |
| Chronic kidney disease<br>(CKD)                  | 31 (11.8%)                                 | 12 (2.7%)                                             | 9 (4.9%)                                             | 12 (13.0%)                   | 4 (5.2%)                      | 10 (4.7%)                         |
| Dialysis                                         | 26 (9.9%)                                  | 3 (0.7%)                                              | 7 (3.8%)                                             | 11 (12.0%)                   | ≤3 (<4.0%)                    | 5 (2.3%)                          |

**Table S5:** Baseline characteristics stratified by microbiological etiology in patients who underwent surgery.

| Variable                                        | <i>S. aureus</i> ,<br>N = 262 <sup>a</sup> | <i>Streptococcus</i><br>spp.,<br>N = 447 <sup>a</sup> | <i>Enterococcus</i><br>spp.,<br>N = 183 <sup>a</sup> | CoNS,<br>N = 92 <sup>a</sup> | Other,<br>N = 77 <sup>a</sup> | Negative,<br>N = 215 <sup>a</sup> |
|-------------------------------------------------|--------------------------------------------|-------------------------------------------------------|------------------------------------------------------|------------------------------|-------------------------------|-----------------------------------|
| Diabetes                                        | 46 (17.6%)                                 | 65 (14.5%)                                            | 33 (18.0%)                                           | 16 (17.4%)                   | 13 (16.9%)                    | 29 (13.5%)                        |
| Liver disease                                   | 10 (3.8%)                                  | 12 (2.7%)                                             | 3 (1.6%)                                             | 4 (4.3%)                     | 3 (3.9%)                      | 3 (1.4%)                          |
| Chronic obstructive<br>pulmonary disease (COPD) | 16 (6.1%)                                  | 19 (4.3%)                                             | 14 (7.7%)                                            | 6 (6.5%)                     | ≤3 (<4.0%)                    | 19 (8.8%)                         |
| Anticoagulants                                  | 47 (17.9%)                                 | 68 (15.2%)                                            | 55 (30.1%)                                           | 29 (31.5%)                   | 20 (26.0%)                    | 41 (19.1%)                        |
| Beta blockers                                   | 72 (27.5%)                                 | 87 (19.5%)                                            | 58 (31.7%)                                           | 36 (39.1%)                   | 22 (28.6%)                    | 61 (28.4%)                        |
| Lipid-lowering medication                       | 80 (30.5%)                                 | 137 (30.6%)                                           | 78 (42.6%)                                           | 33 (35.9%)                   | 22 (28.6%)                    | 59 (27.4%)                        |
| RAS inhibitors                                  | 101 (38.5%)                                | 141 (31.5%)                                           | 86 (47.0%)                                           | 35 (38.0%)                   | 25 (32.5%)                    | 76 (35.3%)                        |

<sup>a</sup>Median [25th.75th percentile] or Frequency (%)

**Table S6:** Overview of status at discharge (alive or dead) in numbers and percentages according to microbiological etiology and treatment choice

|                                            | <i>S. aureus</i><br>(N=1924) | <i>Streptococcus</i> spp.<br>(N=1752) | <i>Enterococcus</i> spp.<br>(N=982) | CoNS<br>(N=414) | Other<br>(N=327) | Negative<br>(N=856) | Total<br>(N=6255)            |
|--------------------------------------------|------------------------------|---------------------------------------|-------------------------------------|-----------------|------------------|---------------------|------------------------------|
| Surgery and death during admission         | 48 (2.5%)                    | 50 (2.8%)                             | 20 (2.0%)                           | 9 (2.2%)        | 9 (2.8%)         | 19 (2.2%)           | 155 (2.5%)<br>(12.1%)*       |
| Surgery and alive at discharge             | 214<br>(11.1%)               | 397 (22.7%)                           | 163 (16.6%)                         | 83<br>(20.1%)   | 68<br>(20.8%)    | 196<br>(22.9%)      | 1121<br>(17.9%)<br>(87.9%)*  |
| Medical therapy and death during admission | 489<br>(25.4%)               | 161 (9.2%)                            | 147 (15.0%)                         | 76<br>(18.4%)   | 40<br>(12.2%)    | 131<br>(12.6%)      | 1044<br>(16.7%)<br>(21.0%)** |
| Medical therapy and alive at discharge     | 1173<br>(61.0%)              | 1144 (65.3%)                          | 652 (66.4%)                         | 246<br>(59.4%)  | 210<br>(64.2%)   | 510<br>(59.6%)      | 3935<br>(62.9%)<br>(79.0%)** |

\*Out of all patients who underwent surgery during admission (N=1276)

\*\* Out of all patients who received medical therapy only (N=4979)

**Figure S1:** Proportion of treatment choice stratified by microbiological etiologies after exclusion of CIED at baseline

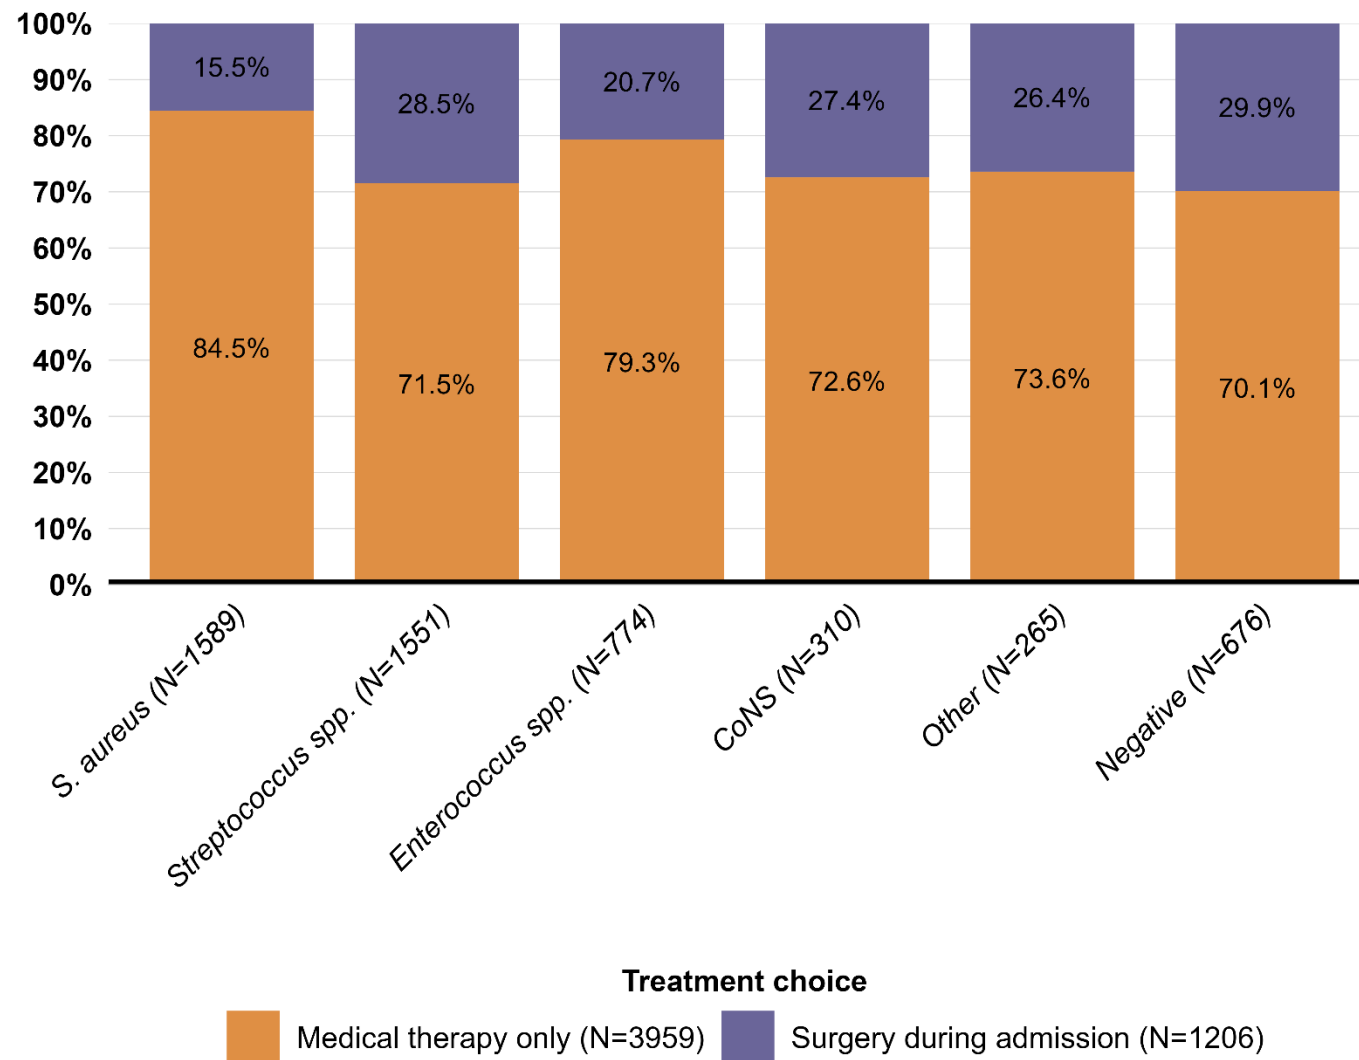

**Figure S2:** Proportion of microbiological etiologies stratified by treatment choice (surgery during admission vs. medical therapy) after exclusion of CIED at baseline

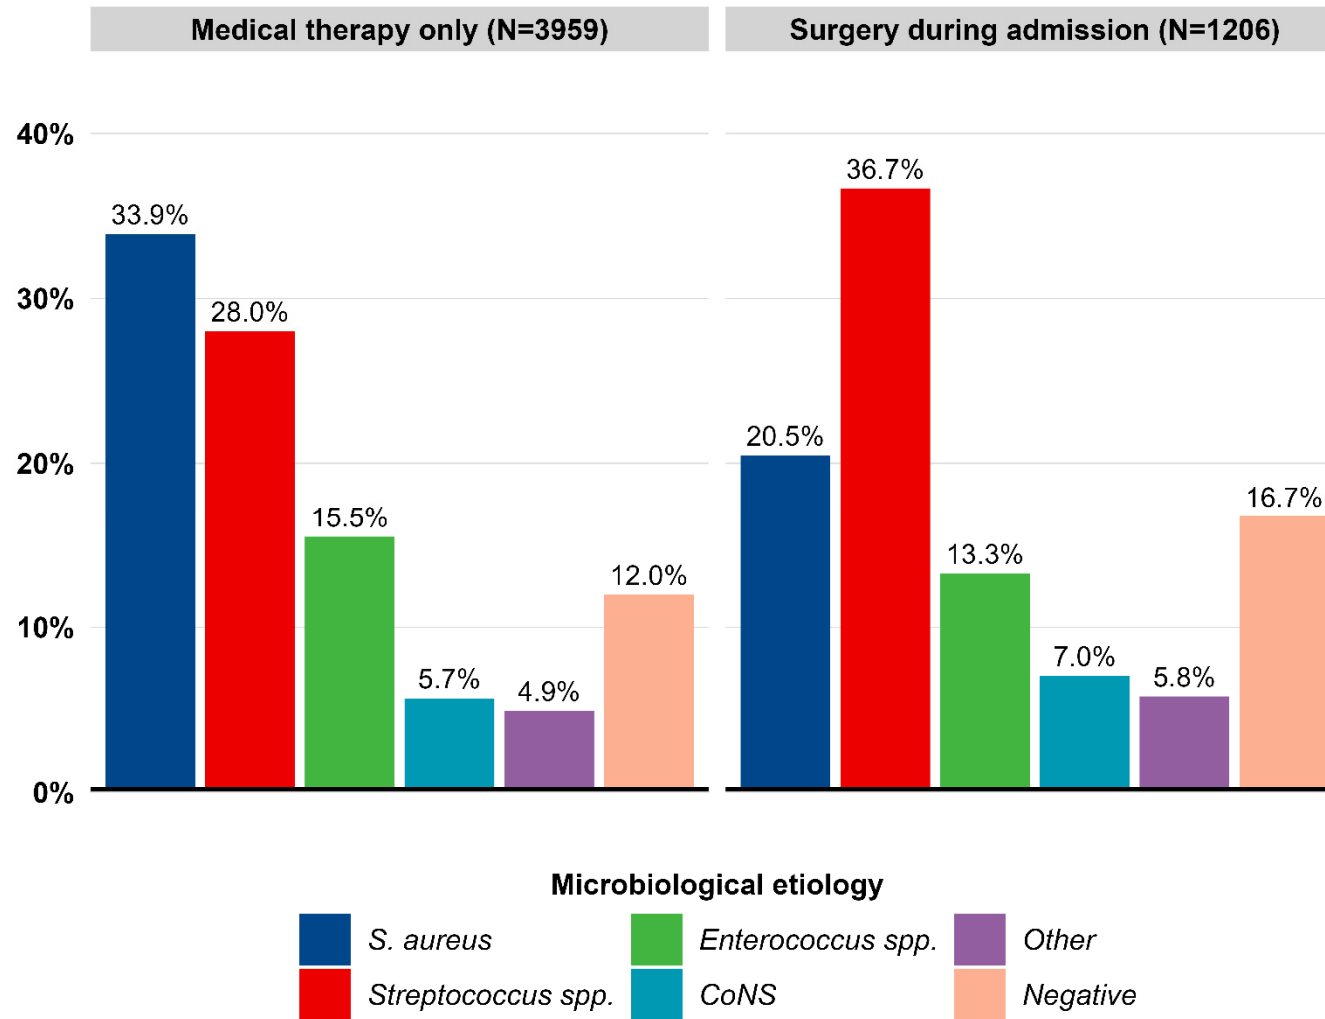

**Figure S3:** Proportion of microbiological etiologies stratified by treatment choice (surgery during admission vs. medical therapy) in an age – and sex-matched cohort

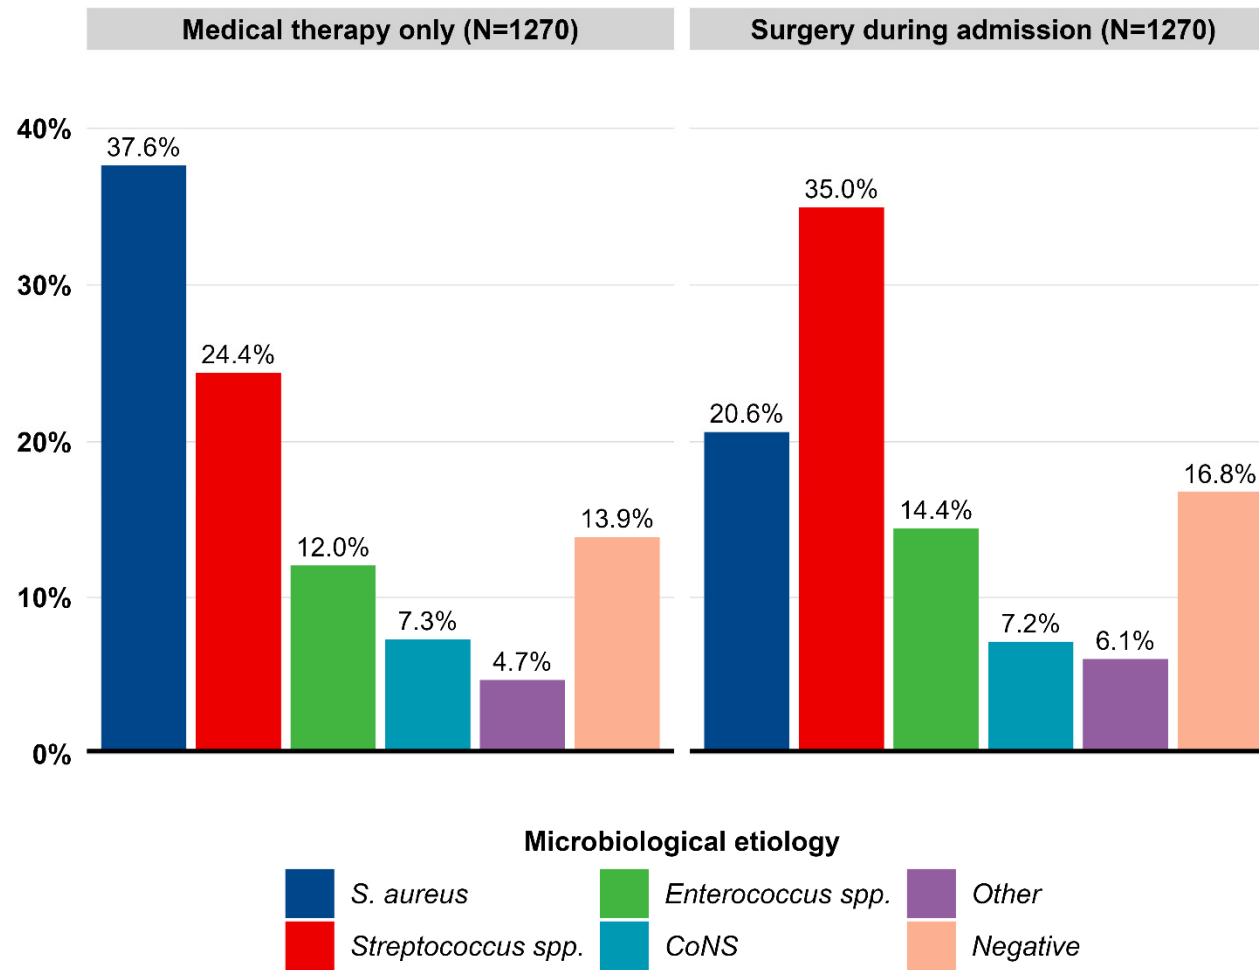



**Figure S4:** Cumulative incidence of surgery during admission stratified by microbiological etiology

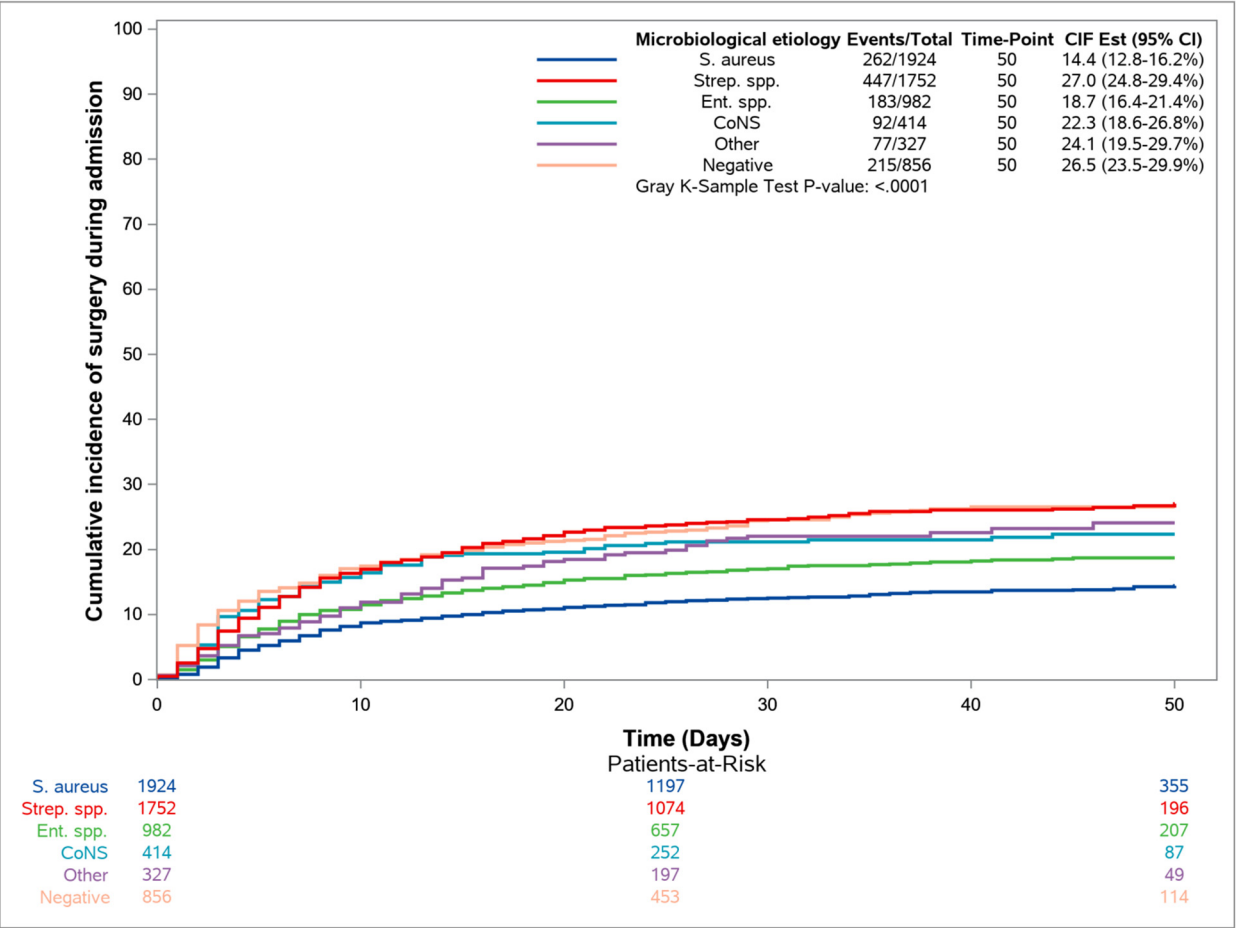

**Figure S5A+B:** Mortality rates by microbiological etiology and treatment choice (surgery during admission vs. medical therapy) in an age -and sex-matched cohort.

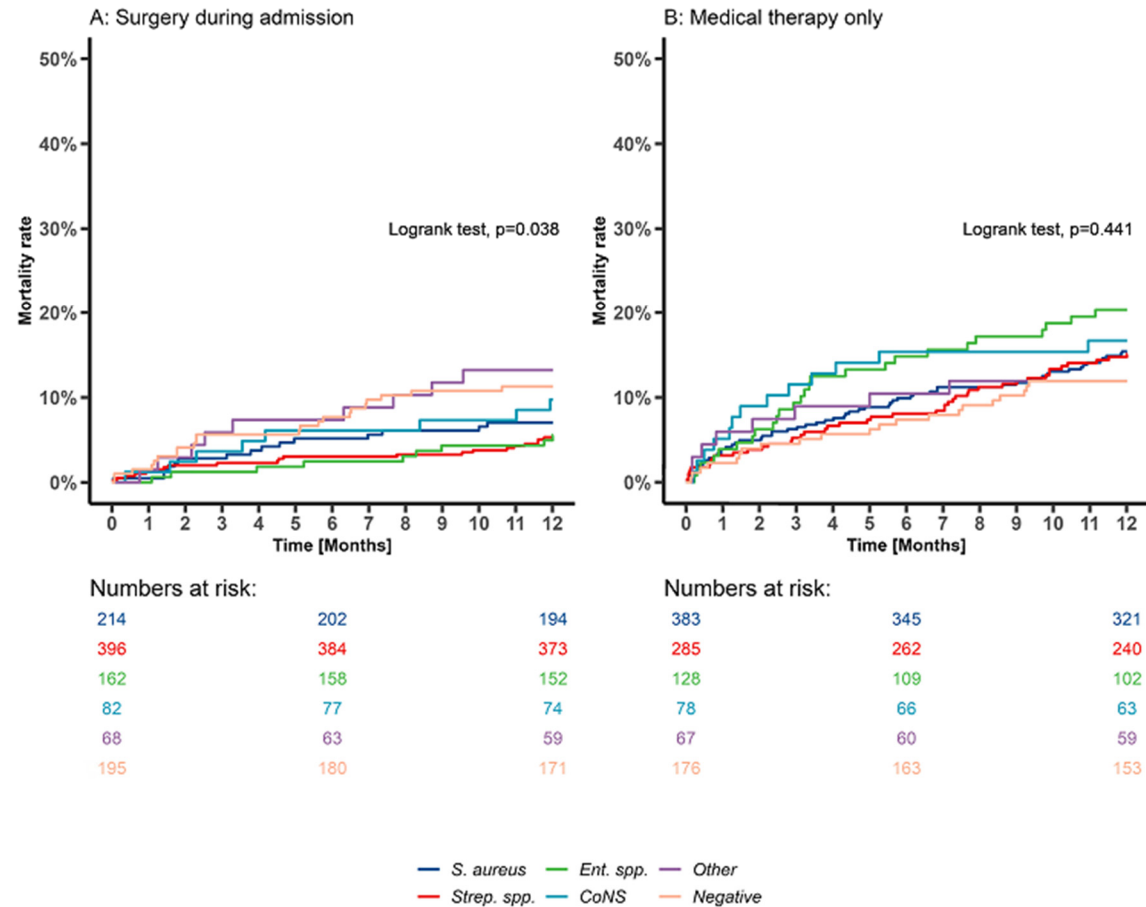

Supplement: s1 [file s1]
